# Supplementary material for: Teflon films for chemically-inert microfluidic valves and pumps
Source: Royal Society of Chemistry journal article supplement (doi:10.1039/b800600h), 2008-01-01
Supplement: b800600h.pdf [file b800600h.pdf]

**Supplementary information for *Teflon films for chemically-inert microfluidic valves and pumps***  
by W. H. Grover, M. G. von Muhlen, and S. R. Manalis, Massachusetts Institute of Technology

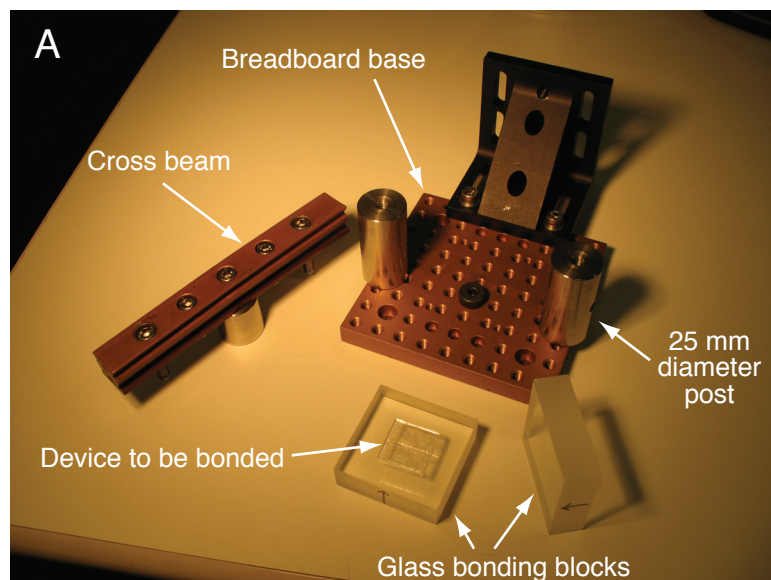

Disassembled bonding clamp, showing an assembled glass-Teflon-glass device on top of a borosilicate glass bonding block (McMaster-Carr part 8476K127). The clamp is constructed from optical hardware (Thorlabs), including an 11 cm square aluminum breadboard base, two 25 mm diameter by 50 mm tall threaded posts, and a 15 cm long cross beam.

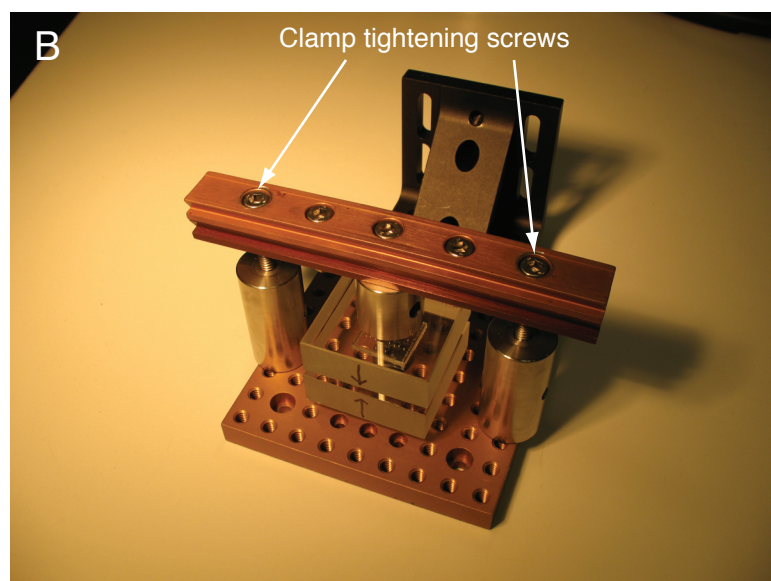

Assembled bonding clamp. When the outermost 1/4-20 screws on the beam are tightened, the bonding stack is compressed between a 14 mm diameter flat screw in the base (visible in Photo A) and a 25 mm diameter by 25 mm tall post attached to the cross beam.

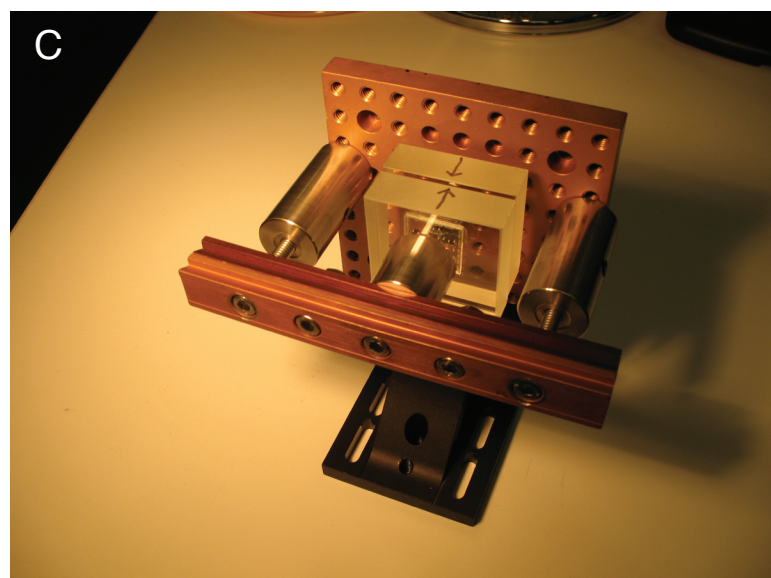

Assembled bonding clamp turned on its side and ready to be placed in oven.
